# Supplementary material for: Health-Related Productivity Loss According to Health Conditions among Workers in South Korea
Source: MDPI journal article supplement (doi:10.3390/ijerph18147589), 2021-07-16
Supplement: s1 [file s1]

**Table S1.** Demographic characteristics of the study participants by health conditions.

|                                               | Without any health condition | Fatigue     | Neck and/or shoulder pain | Sleep deprivation | Back pain   | Headache    | Common cold and flu | Eye disorders | Dianhea or constipation | Insomnia    |
|-----------------------------------------------|------------------------------|-------------|---------------------------|-------------------|-------------|-------------|---------------------|---------------|-------------------------|-------------|
| <b>Total</b>                                  | 968 (100)                    | 1507 (38.8) | 1208 (31.1)               | 1077 (27.7)       | 938 (24.2)  | 838 (21.6)  | 757 (19.5)          | 516 (13.3)    | 442 (11.4)              | 378 (9.7)   |
| <b>Mean HRPL (%) (SD)</b>                     | 16.7 (23.9)                  | 30.5 (26)   | 32.8 (26.5)               | 34 (26.3)         | 33.9 (26.3) | 35.3 (27.3) | 33.6 (27.9)         | 32.4 (26.1)   | 36.2 (27)               | 40.5 (27.2) |
| <b>Gender</b>                                 |                              |             |                           |                   |             |             |                     |               |                         |             |
| Male                                          | 606 (62.6)                   | 633 (42)    | 447 (37)                  | 477 (44.3)        | 382 (40.7)  | 283 (33.8)  | 311 (41.1)          | 155 (30)      | 167 (37.8)              | 170 (45)    |
| Female                                        | 362 (37.4)                   | 874 (58)    | 761 (63)                  | 600 (55.7)        | 556 (59.3)  | 555 (66.2)  | 446 (58.9)          | 361 (70)      | 275 (62.2)              | 208 (55)    |
| <b>Age</b>                                    |                              |             |                           |                   |             |             |                     |               |                         |             |
| 20~29                                         | 238 (24.6)                   | 383 (25.4)  | 335 (27.7)                | 313 (29.1)        | 252 (26.9)  | 247 (29.5)  | 193 (25.5)          | 153 (29.7)    | 140 (31.7)              | 101 (26.7)  |
| 30~39                                         | 244 (25.2)                   | 457 (30.3)  | 390 (32.3)                | 365 (33.9)        | 305 (32.5)  | 285 (34)    | 243 (32.1)          | 151 (29.3)    | 144 (32.6)              | 137 (36.2)  |
| 40~49                                         | 260 (26.9)                   | 442 (29.3)  | 330 (27.3)                | 281 (26.1)        | 255 (27.2)  | 224 (26.7)  | 211 (27.9)          | 123 (23.8)    | 110 (24.9)              | 88 (23.3)   |
| 50~59                                         | 160 (16.5)                   | 168 (11.1)  | 118 (9.8)                 | 91 (8.4)          | 88 (9.4)    | 62 (7.4)    | 82 (10.8)           | 71 (13.8)     | 39 (8.8)                | 35 (9.3)    |
| 60~                                           | 66 (6.8)                     | 57 (3.8)    | 35 (2.9)                  | 27 (2.5)          | 38 (4.1)    | 20 (2.4)    | 28 (3.7)            | 18 (3.5)      | 9 (2)                   | 17 (4.5)    |
| <b>Education</b>                              |                              |             |                           |                   |             |             |                     |               |                         |             |
| ≤ High school                                 | 196 (20.2)                   | 279 (18.5)  | 254 (21)                  | 196 (18.2)        | 206 (22)    | 155 (18.5)  | 137 (18.1)          | 97 (18.8)     | 78 (17.6)               | 81 (21.4)   |
| College or University                         | 681 (70.4)                   | 1075 (71.3) | 843 (69.8)                | 774 (71.9)        | 647 (69)    | 590 (70.4)  | 541 (71.5)          | 365 (70.7)    | 325 (73.5)              | 265 (70.1)  |
| Graduate school                               | 91 (9.4)                     | 153 (10.2)  | 111 (9.2)                 | 107 (9.9)         | 85 (9.1)    | 93 (11.1)   | 79 (10.4)           | 54 (10.5)     | 39 (8.8)                | 32 (8.5)    |
| <b>Annual Household income (KRW, million)</b> |                              |             |                           |                   |             |             |                     |               |                         |             |
| 1st Tercile (−30)                             | 311 (32.1)                   | 493 (32.7)  | 376 (31.1)                | 372 (34.5)        | 315 (33.6)  | 272 (32.5)  | 261 (34.5)          | 164 (31.8)    | 150 (33.9)              | 143 (37.8)  |
| 2nd Tercile (30–50)                           | 328 (33.9)                   | 516 (34.2)  | 409 (33.9)                | 345 (32)          | 314 (33.5)  | 282 (33.7)  | 244 (32.2)          | 180 (34.9)    | 132 (29.9)              | 117 (31)    |
| 3rd Tercile (51–75)                           | 329 (34)                     | 498 (33)    | 423 (35)                  | 360 (33.4)        | 309 (32.9)  | 284 (33.9)  | 252 (33.3)          | 172 (33.3)    | 160 (36.2)              | 118 (31.2)  |
| <b>Marital status</b>                         |                              |             |                           |                   |             |             |                     |               |                         |             |
| Single                                        | 447 (46.2)                   | 738 (49)    | 644 (53.3)                | 616 (57.2)        | 487 (51.9)  | 452 (53.9)  | 384 (50.7)          | 297 (57.6)    | 246 (55.7)              | 222 (58.7)  |
| Married                                       | 485 (50.1)                   | 690 (45.8)  | 514 (42.6)                | 415 (38.5)        | 411 (43.8)  | 350 (41.8)  | 343 (45.3)          | 195 (37.8)    | 177 (40)                | 137 (36.2)  |
| Separated                                     | 13 (1.3)                     | 23 (1.5)    | 10 (0.8)                  | 12 (1.1)          | 7 (0.7)     | 8 (1)       | 10 (1.3)            | 8 (1.6)       | 5 (1.1)                 | 3 (0.8)     |
| Widowed                                       | 2 (0.2)                      | 13 (0.9)    | 10 (0.8)                  | 9 (0.8)           | 8 (0.9)     | 6 (0.7)     | 5 (0.7)             | 5 (1)         | 2 (0.5)                 | 4 (1.1)     |
| Divorced                                      | 21 (2.2)                     | 43 (2.9)    | 30 (2.5)                  | 25 (2.3)          | 25 (2.7)    | 22 (2.6)    | 15 (2)              | 11 (2.1)      | 12 (2.7)                | 12 (3.2)    |
| <b>Employment status</b>                      |                              |             |                           |                   |             |             |                     |               |                         |             |
| Regular                                       | 869 (89.8)                   | 1369 (90.8) | 1094 (90.6)               | 978 (90.8)        | 839 (89.4)  | 768 (91.6)  | 671 (88.6)          | 476 (92.2)    | 395 (89.4)              | 338 (89.4)  |
| Temporary                                     | 71 (7.3)                     | 103 (6.8)   | 91 (7.5)                  | 79 (7.3)          | 77 (8.2)    | 58 (6.9)    | 67 (8.9)            | 32 (6.2)      | 36 (8.1)                | 32 (8.5)    |
| Day labourer                                  | 28 (2.9)                     | 35 (2.3)    | 23 (1.9)                  | 20 (1.9)          | 22 (2.3)    | 12 (1.4)    | 19 (2.5)            | 8 (1.6)       | 11 (2.5)                | 8 (2.1)     |
| <b>Occupation</b>                             |                              |             |                           |                   |             |             |                     |               |                         |             |
| White collar                                  | 611 (63.1)                   | 1017 (67.5) | 799 (66.1)                | 737 (68.4)        | 572 (61)    | 585 (69.8)  | 525 (69.4)          | 362 (70.2)    | 288 (65.2)              | 256 (67.7)  |
| Blue collar                                   | 357 (36.9)                   | 490 (32.5)  | 409 (33.9)                | 340 (31.6)        | 366 (39)    | 253 (30.2)  | 232 (30.6)          | 154 (29.8)    | 154 (34.8)              | 122 (32.3)  |
| <b>Weekly working hours</b>                   |                              |             |                           |                   |             |             |                     |               |                         |             |
| < 40 hours / week                             | 137 (14.2)                   | 205 (13.6)  | 168 (13.9)                | 131 (12.2)        | 126 (13.4)  | 116 (13.8)  | 120 (15.9)          | 71 (13.8)     | 70 (15.8)               | 51 (13.5)   |
| = 40 hours / week                             | 402 (41.5)                   | 570 (37.8)  | 460 (38.1)                | 376 (34.9)        | 342 (36.5)  | 323 (38.5)  | 314 (41.5)          | 209 (40.5)    | 163 (36.9)              | 135 (35.7)  |
| 41–52 hours / week                            | 281 (29)                     | 500 (33.2)  | 383 (31.7)                | 369 (34.3)        | 297 (31.7)  | 268 (32)    | 215 (28.4)          | 167 (32.4)    | 136 (30.8)              | 130 (34.4)  |
| > 52 hours / week                             | 148 (15.3)                   | 232 (15.4)  | 197 (16.3)                | 201 (18.7)        | 173 (18.4)  | 131 (15.6)  | 108 (14.3)          | 69 (13.4)     | 73 (16.5)               | 62 (16.4)   |

|                                                   |                |                                |                   |                      |                                    |                            |                             |                                 |                               |               |
|---------------------------------------------------|----------------|--------------------------------|-------------------|----------------------|------------------------------------|----------------------------|-----------------------------|---------------------------------|-------------------------------|---------------|
| <b>Smoking</b>                                    |                |                                |                   |                      |                                    |                            |                             |                                 |                               |               |
| No                                                | 706 (72.9)     | 1126 (74.7)                    | 932 (77.2)        | 784 (72.8)           | 692 (73.8)                         | 663 (79.1)                 | 562 (74.2)                  | 413 (80)                        | 340 (76.9)                    | 260 (68.8)    |
| Yes                                               | 262 (27.1)     | 381 (25.3)                     | 276 (22.8)        | 293 (27.2)           | 246 (26.2)                         | 175 (20.9)                 | 195 (25.8)                  | 103 (20)                        | 102 (23.1)                    | 118 (31.2)    |
| <b>Binge drinking</b>                             |                |                                |                   |                      |                                    |                            |                             |                                 |                               |               |
| No                                                | 568 (58.7)     | 834 (55.3)                     | 690 (57.1)        | 563 (52.3)           | 531 (56.6)                         | 486 (58)                   | 415 (54.8)                  | 293 (56.8)                      | 230 (52)                      | 190 (50.3)    |
| Yes                                               | 400 (41.3)     | 673 (44.7)                     | 518 (42.9)        | 514 (47.7)           | 407 (43.4)                         | 352 (42)                   | 342 (45.2)                  | 223 (43.2)                      | 212 (48)                      | 188 (49.7)    |
| <b>Exercise</b>                                   |                |                                |                   |                      |                                    |                            |                             |                                 |                               |               |
| No                                                | 719 (74.3)     | 1185 (78.6)                    | 953 (78.9)        | 824 (76.5)           | 737 (78.6)                         | 645 (77)                   | 575 (76)                    | 398 (77.1)                      | 333 (75.3)                    | 282 (74.6)    |
| Yes                                               | 249 (25.7)     | 322 (21.4)                     | 255 (21.1)        | 253 (23.5)           | 201 (21.4)                         | 193 (23)                   | 182 (24)                    | 118 (22.9)                      | 109 (24.7)                    | 96 (25.4)     |
|                                                   | <b>Anxiety</b> | <b>Having a hango-<br/>ver</b> | <b>Depression</b> | <b>Enterocolitis</b> | <b>Skin disease or<br/>itching</b> | <b>Dental<br/>problems</b> | <b>Allergic<br/>disease</b> | <b>Respiratory<br/>symptoms</b> | <b>Urinary symp-<br/>toms</b> | <b>Anemia</b> |
| <b>Total</b>                                      | 358 (9.2)      | 303 (7.8)                      | 296 (7.6)         | 325 (8.4)            | 279 (7.2)                          | 213 (5.5)                  | 203 (5.2)                   | 175 (4.5)                       | 175 (4.5)                     | 147 (3.8)     |
| <b>Mean HRPL (%) (SD)</b>                         | 41.2 (26.7)    | 32 (27.2)                      | 41.3 (25.8)       | 40.5 (28.2)          | 33.3 (27.7)                        | 33.2 (25.6)                | 34.1 (27.5)                 | 39.2 (30.1)                     | 35.2 (27.2)                   | 40.7 (27.4)   |
| <b>Gender</b>                                     |                |                                |                   |                      |                                    |                            |                             |                                 |                               |               |
| Male                                              | 161 (45)       | 211 (64.9)                     | 110 (36.3)        | 131 (44.3)           | 114 (40.9)                         | 99 (46.5)                  | 58 (28.6)                   | 85 (48.6)                       | 72 (41.1)                     | 33 (22.4)     |
| Female                                            | 197 (55)       | 114 (35.1)                     | 193 (63.7)        | 165 (55.7)           | 165 (59.1)                         | 114 (53.5)                 | 145 (71.4)                  | 90 (51.4)                       | 103 (58.9)                    | 114 (77.6)    |
| <b>Age</b>                                        |                |                                |                   |                      |                                    |                            |                             |                                 |                               |               |
| 20~29                                             | 104 (29.1)     | 86 (26.5)                      | 105 (34.7)        | 90 (30.4)            | 81 (29)                            | 41 (19.2)                  | 47 (23.2)                   | 49 (28)                         | 40 (22.9)                     | 50 (34)       |
| 30~39                                             | 126 (35.2)     | 106 (32.6)                     | 103 (34)          | 109 (36.8)           | 95 (34.1)                          | 67 (31.5)                  | 61 (30)                     | 68 (38.9)                       | 49 (28)                       | 39 (26.5)     |
| 40~49                                             | 94 (26.3)      | 96 (29.5)                      | 72 (23.8)         | 75 (25.3)            | 71 (25.4)                          | 62 (29.1)                  | 64 (31.5)                   | 39 (22.3)                       | 54 (30.9)                     | 38 (25.9)     |
| 50~59                                             | 25 (7)         | 27 (8.3)                       | 17 (5.6)          | 18 (6.1)             | 22 (7.9)                           | 27 (12.7)                  | 25 (12.3)                   | 12 (6.9)                        | 13 (7.4)                      | 17 (11.6)     |
| 60~                                               | 9 (2.5)        | 10 (3.1)                       | 6 (2)             | 4 (1.4)              | 10 (3.6)                           | 16 (7.5)                   | 6 (3)                       | 7 (4)                           | 19 (10.9)                     | 3 (2)         |
| <b>Education</b>                                  |                |                                |                   |                      |                                    |                            |                             |                                 |                               |               |
| ≤ High school                                     | 70 (19.6)      | 47 (14.5)                      | 65 (21.5)         | 44 (14.9)            | 49 (17.6)                          | 39 (18.3)                  | 36 (17.7)                   | 34 (19.4)                       | 28 (16)                       | 35 (23.8)     |
| College or University                             | 253 (70.7)     | 253 (77.8)                     | 212 (70)          | 222 (75)             | 191 (68.5)                         | 148 (69.5)                 | 145 (71.4)                  | 126 (72)                        | 128 (73.1)                    | 103 (70.1)    |
| Graduate school                                   | 35 (9.8)       | 25 (7.7)                       | 26 (8.6)          | 30 (10.1)            | 39 (14)                            | 26 (12.2)                  | 22 (10.8)                   | 15 (8.6)                        | 19 (10.9)                     | 9 (6.1)       |
| <b>Annual Household income<br/>(KRW, million)</b> |                |                                |                   |                      |                                    |                            |                             |                                 |                               |               |
| 1st Tercile (−30)                                 | 144 (40.2)     | 102 (31.4)                     | 121 (39.9)        | 104 (35.1)           | 97 (34.8)                          | 73 (34.3)                  | 71 (35)                     | 60 (34.3)                       | 72 (41.1)                     | 56 (38.1)     |
| 2nd Tercile (30−50)                               | 114 (31.8)     | 112 (34.5)                     | 98 (32.3)         | 101 (34.1)           | 92 (33)                            | 69 (32.4)                  | 59 (29.1)                   | 57 (32.6)                       | 52 (29.7)                     | 44 (29.9)     |
| 3rd Tercile (51−75)                               | 100 (27.9)     | 111 (34.2)                     | 84 (27.7)         | 91 (30.7)            | 90 (32.3)                          | 71 (33.3)                  | 73 (36)                     | 58 (33.1)                       | 51 (29.1)                     | 47 (32)       |
| <b>Marital status</b>                             |                |                                |                   |                      |                                    |                            |                             |                                 |                               |               |
| Single                                            | 222 (62)       | 164 (50.5)                     | 194 (64)          | 170 (57.4)           | 155 (55.6)                         | 99 (46.5)                  | 105 (51.7)                  | 97 (55.4)                       | 79 (45.1)                     | 83 (56.5)     |
| Married                                           | 121 (33.8)     | 152 (46.8)                     | 96 (31.7)         | 114 (38.5)           | 113 (40.5)                         | 105 (49.3)                 | 88 (43.4)                   | 67 (38.3)                       | 88 (50.3)                     | 55 (37.4)     |
| Separated                                         | 2 (0.6)        | 1 (0.3)                        | 1 (0.3)           | 1 (0.3)              | 4 (1.4)                            | 2 (0.9)                    | 1 (0.5)                     | 2 (1.1)                         | 3 (1.7)                       | 3 (2)         |
| Widowed                                           | 5 (1.4)        | 1 (0.3)                        | 2 (0.7)           | 1 (0.3)              | 2 (0.7)                            | 2 (0.9)                    | 0 (0)                       | 3 (1.7)                         | 0 (0)                         | 1 (0.7)       |
| Divorced                                          | 8 (2.2)        | 7 (2.2)                        | 10 (3.3)          | 10 (3.4)             | 5 (1.8)                            | 5 (2.3)                    | 9 (4.4)                     | 6 (3.4)                         | 5 (2.9)                       | 5 (3.4)       |
| <b>Employment status</b>                          |                |                                |                   |                      |                                    |                            |                             |                                 |                               |               |
| Regular                                           | 321 (89.7)     | 303 (93.2)                     | 266 (87.8)        | 267 (90.2)           | 254 (91)                           | 195 (91.5)                 | 182 (89.7)                  | 148 (84.6)                      | 155 (88.6)                    | 132 (89.8)    |
| Temporary                                         | 23 (6.4)       | 19 (5.8)                       | 27 (8.9)          | 22 (7.4)             | 23 (8.2)                           | 17 (8)                     | 19 (9.4)                    | 23 (13.1)                       | 15 (8.6)                      | 12 (8.2)      |
| Day labourer                                      | 14 (3.9)       | 3 (0.9)                        | 10 (3.3)          | 7 (2.4)              | 2 (0.7)                            | 1 (0.5)                    | 2 (1)                       | 4 (2.3)                         | 5 (2.9)                       | 3 (2)         |
| <b>Occupation</b>                                 |                |                                |                   |                      |                                    |                            |                             |                                 |                               |               |
| White collar                                      | 236 (65.9)     | 229 (70.5)                     | 206 (68)          | 212 (71.6)           | 172 (61.6)                         | 149 (70)                   | 140 (69)                    | 94 (53.7)                       | 108 (61.7)                    | 93 (63.3)     |

|                                                   |             |              |                                    |                                     |              |                                                 |                    |             |                        |            |
|---------------------------------------------------|-------------|--------------|------------------------------------|-------------------------------------|--------------|-------------------------------------------------|--------------------|-------------|------------------------|------------|
| Blue collar                                       | 122 (34.1)  | 96 (29.5)    | 97 (32)                            | 84 (28.4)                           | 107 (38.4)   | 64 (30)                                         | 63 (31)            | 81 (46.3)   | 67 (38.3)              | 54 (36.7)  |
| <b>Weekly working hours</b>                       |             |              |                                    |                                     |              |                                                 |                    |             |                        |            |
| < 40 hours / week                                 | 43 (12)     | 27 (8.3)     | 48 (15.8)                          | 37 (12.5)                           | 37 (13.3)    | 28 (13.1)                                       | 31 (15.3)          | 26 (14.9)   | 29 (16.6)              | 23 (15.6)  |
| = 40 hours / week                                 | 125 (34.9)  | 114 (35.1)   | 105 (34.7)                         | 116 (39.2)                          | 106 (38)     | 77 (36.2)                                       | 72 (35.5)          | 55 (31.4)   | 66 (37.7)              | 53 (36.1)  |
| 41–52 hours / week                                | 118 (33)    | 113 (34.8)   | 101 (33.3)                         | 87 (29.4)                           | 84 (30.1)    | 70 (32.9)                                       | 67 (33)            | 55 (31.4)   | 58 (33.1)              | 50 (34)    |
| > 52 hours / week                                 | 72 (20.1)   | 71 (21.8)    | 49 (16.2)                          | 56 (18.9)                           | 52 (18.6)    | 38 (17.8)                                       | 33 (16.3)          | 39 (22.3)   | 22 (12.6)              | 21 (14.3)  |
| <b>Smoking</b>                                    |             |              |                                    |                                     |              |                                                 |                    |             |                        |            |
| No                                                | 270 (75.4)  | 177 (54.5)   | 232 (76.6)                         | 216 (73)                            | 203 (72.8)   | 152 (71.4)                                      | 163 (80.3)         | 122 (69.7)  | 148 (84.6)             | 112 (76.2) |
| Yes                                               | 88 (24.6)   | 148 (45.5)   | 71 (23.4)                          | 80 (27)                             | 76 (27.2)    | 61 (28.6)                                       | 40 (19.7)          | 53 (30.3)   | 27 (15.4)              | 35 (23.8)  |
| <b>Binge drinking</b>                             |             |              |                                    |                                     |              |                                                 |                    |             |                        |            |
| No                                                | 190 (53.1)  | 52 (16)      | 162 (53.5)                         | 146 (49.3)                          | 148 (53)     | 113 (53.1)                                      | 108 (53.2)         | 93 (53.1)   | 107 (61.1)             | 90 (61.2)  |
| Yes                                               | 168 (46.9)  | 273 (84)     | 141 (46.5)                         | 150 (50.7)                          | 131 (47)     | 100 (46.9)                                      | 95 (46.8)          | 82 (46.9)   | 68 (38.9)              | 57 (38.8)  |
| <b>Exercise</b>                                   |             |              |                                    |                                     |              |                                                 |                    |             |                        |            |
| No                                                | 263 (73.5)  | 238 (73.2)   | 240 (79.2)                         | 231 (78)                            | 224 (80.3)   | 161 (75.6)                                      | 159 (78.3)         | 141 (80.6)  | 141 (80.6)             | 117 (79.6) |
| Yes                                               | 95 (26.5)   | 87 (26.8)    | 63 (20.8)                          | 65 (22)                             | 55 (19.7)    | 52 (24.4)                                       | 44 (21.7)          | 34 (19.4)   | 34 (19.4)              | 30 (20.4)  |
|                                                   | Esophagitis | Hypertension | Gastric ulcer or<br>duodenal ulcer | Upper limb<br>or lower<br>limb pain | Dyslipidemia | Post-menopausal or<br>post-andropausal symptoms | Hearing impairment | Asthma      | Diabetes melli-<br>tus | Etc.       |
| <b>Total</b>                                      | 144 (3.7)   | 117 (3)      | 119 (3.1)                          | 106 (2.7)                           | 91 (2.3)     | 83 (2.1)                                        | 80 (2.1)           | 47 (1.2)    | 51 (1.3)               | 47 (1.2)   |
| <b>Mean HRPL (%) (SD)</b>                         | 38.5 (26.7) | 33.5 (26)    | 41.7 (31)                          | 36.9 (27.4)                         | 37.2 (26.3)  | 32 (28.6)                                       | 40 (26.6)          | 32.2 (25.7) | 34.9 (28.6)            | 28.8 (25)  |
| <b>Gender</b>                                     |             |              |                                    |                                     |              |                                                 |                    |             |                        |            |
| Male                                              | 62 (43.1)   | 96 (80.7)    | 50 (42.7)                          | 35 (33)                             | 65 (71.4)    | 16 (20)                                         | 53 (63.9)          | 32 (62.7)   | 35 (74.5)              | 15 (31.9)  |
| Female                                            | 82 (56.9)   | 23 (19.3)    | 67 (57.3)                          | 71 (67)                             | 26 (28.6)    | 64 (80)                                         | 30 (36.1)          | 19 (37.3)   | 12 (25.5)              | 32 (68.1)  |
| <b>Age</b>                                        |             |              |                                    |                                     |              |                                                 |                    |             |                        |            |
| 20~29                                             | 35 (24.3)   | 10 (8.4)     | 12 (10.3)                          | 23 (21.7)                           | 1 (1.1)      | 0 (0)                                           | 29 (34.9)          | 9 (17.6)    | 6 (12.8)               | 11 (23.4)  |
| 30~39                                             | 43 (29.9)   | 19 (16)      | 42 (35.9)                          | 25 (23.6)                           | 11 (12.1)    | 2 (2.5)                                         | 23 (27.7)          | 15 (29.4)   | 4 (8.5)                | 21 (44.7)  |
| 40~49                                             | 48 (33.3)   | 37 (31.1)    | 46 (39.3)                          | 35 (33)                             | 34 (37.4)    | 25 (31.3)                                       | 16 (19.3)          | 17 (33.3)   | 12 (25.5)              | 7 (14.9)   |
| 50~59                                             | 16 (11.1)   | 30 (25.2)    | 12 (10.3)                          | 19 (17.9)                           | 29 (31.9)    | 43 (53.8)                                       | 11 (13.3)          | 5 (9.8)     | 15 (31.9)              | 7 (14.9)   |
| 60~                                               | 2 (1.4)     | 23 (19.3)    | 5 (4.3)                            | 4 (3.8)                             | 16 (17.6)    | 10 (12.5)                                       | 4 (4.8)            | 5 (9.8)     | 10 (21.3)              | 1 (2.1)    |
| <b>Education</b>                                  |             |              |                                    |                                     |              |                                                 |                    |             |                        |            |
| ≤ High school                                     | 27 (18.8)   | 27 (22.7)    | 15 (12.8)                          | 25 (23.6)                           | 11 (12.1)    | 22 (27.5)                                       | 22 (26.5)          | 11 (21.6)   | 6 (12.8)               | 11 (23.4)  |
| College or University                             | 96 (66.7)   | 82 (68.9)    | 83 (70.9)                          | 69 (65.1)                           | 63 (69.2)    | 45 (56.3)                                       | 55 (66.3)          | 36 (70.6)   | 32 (68.1)              | 36 (76.6)  |
| Graduate school                                   | 21 (14.6)   | 10 (8.4)     | 19 (16.2)                          | 12 (11.3)                           | 17 (18.7)    | 13 (16.3)                                       | 6 (7.2)            | 4 (7.8)     | 9 (19.1)               | 0 (0)      |
| <b>Annual Household income<br/>(KRW, million)</b> |             |              |                                    |                                     |              |                                                 |                    |             |                        |            |
| 1st Tercile (–30)                                 | 36 (25)     | 35 (29.4)    | 35 (29.9)                          | 34 (32.1)                           | 18 (19.8)    | 28 (35)                                         | 29 (34.9)          | 21 (41.2)   | 12 (25.5)              | 12 (25.5)  |
| 2nd Tercile (30–50)                               | 54 (37.5)   | 53 (44.5)    | 37 (31.6)                          | 43 (40.6)                           | 33 (36.3)    | 28 (35)                                         | 33 (39.8)          | 13 (25.5)   | 19 (40.4)              | 18 (38.3)  |
| 3rd Tercile (51–75)                               | 54 (37.5)   | 31 (26.1)    | 45 (38.5)                          | 29 (27.4)                           | 40 (44)      | 24 (30)                                         | 21 (25.3)          | 17 (33.3)   | 16 (34)                | 17 (36.2)  |
| <b>Marital status</b>                             |             |              |                                    |                                     |              |                                                 |                    |             |                        |            |
| Single                                            | 65 (45.1)   | 29 (24.4)    | 48 (41)                            | 45 (42.5)                           | 16 (17.6)    | 11 (13.8)                                       | 51 (61.4)          | 20 (39.2)   | 14 (29.8)              | 28 (59.6)  |
| Married                                           | 75 (52.1)   | 80 (67.2)    | 66 (56.4)                          | 58 (54.7)                           | 72 (79.1)    | 57 (71.3)                                       | 30 (36.1)          | 28 (54.9)   | 31 (66)                | 18 (38.3)  |
| Separated                                         | 1 (0.7)     | 0 (0)        | 1 (0.9)                            | 0 (0)                               | 1 (1.1)      | 0 (0)                                           | 0 (0)              | 0 (0)       | 0 (0)                  | 1 (2.1)    |
| Widowed                                           | 0 (0)       | 2 (1.7)      | 0 (0)                              | 2 (1.9)                             | 0 (0)        | 5 (6.3)                                         | 0 (0)              | 1 (2)       | 0 (0)                  | 0 (0)      |

|                                        |               |                 |              |             |                       |           |           |           |           |           |
|----------------------------------------|---------------|-----------------|--------------|-------------|-----------------------|-----------|-----------|-----------|-----------|-----------|
| Divorced                               | 3 (2.1)       | 8 (6.7)         | 2 (1.7)      | 1 (0.9)     | 2 (2.2)               | 7 (8.8)   | 2 (2.4)   | 2 (3.9)   | 2 (4.3)   | 0 (0)     |
| Employment status                      |               |                 |              |             |                       |           |           |           |           |           |
| Regular                                | 129 (89.6)    | 109 (91.6)      | 104 (88.9)   | 92 (86.8)   | 81 (89)               | 69 (86.3) | 68 (81.9) | 45 (88.2) | 44 (93.6) | 43 (91.5) |
| Temporary                              | 13 (9)        | 7 (5.9)         | 10 (8.5)     | 12 (11.3)   | 9 (9.9)               | 11 (13.8) | 13 (15.7) | 6 (11.8)  | 3 (6.4)   | 2 (4.3)   |
| Day labourer                           | 2 (1.4)       | 3 (2.5)         | 3 (2.6)      | 2 (1.9)     | 1 (1.1)               | 0 (0)     | 2 (2.4)   | 0 (0)     | 0 (0)     | 2 (4.3)   |
| Occupation                             |               |                 |              |             |                       |           |           |           |           |           |
| White collar                           | 89 (61.8)     | 73 (61.3)       | 76 (65)      | 44 (41.5)   | 59 (64.8)             | 46 (57.5) | 39 (47)   | 36 (70.6) | 32 (68.1) | 34 (72.3) |
| Blue collar                            | 55 (38.2)     | 46 (38.7)       | 41 (35)      | 62 (58.5)   | 32 (35.2)             | 34 (42.5) | 44 (53)   | 15 (29.4) | 15 (31.9) | 13 (27.7) |
| Weekly working hours                   |               |                 |              |             |                       |           |           |           |           |           |
| < 40 hours / week                      | 16 (11.1)     | 16 (13.4)       | 14 (12)      | 15 (14.2)   | 11 (12.1)             | 15 (18.8) | 14 (16.9) | 6 (11.8)  | 9 (19.1)  | 9 (19.1)  |
| = 40 hours / week                      | 54 (37.5)     | 35 (29.4)       | 35 (29.9)    | 42 (39.6)   | 26 (28.6)             | 37 (46.3) | 33 (39.8) | 19 (37.3) | 22 (46.8) | 18 (38.3) |
| 41–52 hours / week                     | 49 (34)       | 44 (37)         | 48 (41)      | 32 (30.2)   | 31 (34.1)             | 14 (17.5) | 18 (21.7) | 14 (27.5) | 9 (19.1)  | 14 (29.8) |
| > 52 hours / week                      | 25 (17.4)     | 24 (20.2)       | 20 (17.1)    | 17 (16)     | 23 (25.3)             | 14 (17.5) | 18 (21.7) | 12 (23.5) | 7 (14.9)  | 6 (12.8)  |
| Smoking                                |               |                 |              |             |                       |           |           |           |           |           |
| No                                     | 101 (70.1)    | 72 (60.5)       | 95 (81.2)    | 82 (77.4)   | 54 (59.3)             | 70 (87.5) | 59 (71.1) | 34 (66.7) | 18 (38.3) | 40 (85.1) |
| Yes                                    | 43 (29.9)     | 47 (39.5)       | 22 (18.8)    | 24 (22.6)   | 37 (40.7)             | 10 (12.5) | 24 (28.9) | 17 (33.3) | 29 (61.7) | 7 (14.9)  |
| Binge drinking                         |               |                 |              |             |                       |           |           |           |           |           |
| No                                     | 79 (54.9)     | 55 (46.2)       | 63 (53.8)    | 66 (62.3)   | 48 (52.7)             | 53 (66.3) | 48 (57.8) | 24 (47.1) | 21 (44.7) | 30 (63.8) |
| Yes                                    | 65 (45.1)     | 64 (53.8)       | 54 (46.2)    | 40 (37.7)   | 43 (47.3)             | 27 (33.8) | 35 (42.2) | 27 (52.9) | 26 (55.3) | 17 (36.2) |
| Exercise                               |               |                 |              |             |                       |           |           |           |           |           |
| No                                     | 105 (72.9)    | 93 (78.2)       | 85 (72.7)    | 87 (82.1)   | 71 (78)               | 67 (83.8) | 64 (77.1) | 35 (68.6) | 36 (76.6) | 32 (68.1) |
| Yes                                    | 39 (27.1)     | 26 (21.8)       | 32 (27.4)    | 19 (17.9)   | 20 (22)               | 13 (16.3) | 19 (22.9) | 16 (31.4) | 11 (23.4) | 15 (31.9) |
|                                        | Liver disease | Cardiac disease | Osteoporosis | Cancer      | Infertility treatment |           |           |           |           |           |
| Total                                  | 29 (0.7)      | 27 (0.7)        | 32 (0.8)     | 21 (0.5)    | 11 (0.3)              |           |           |           |           |           |
| Mean HRPL (%) (SD)                     | 30.6 (28.4)   | 38.2 (23.2)     | 41 (30.5)    | 40.9 (31.4) | 49.2 (23.2)           |           |           |           |           |           |
| Gender                                 |               |                 |              |             |                       |           |           |           |           |           |
| Male                                   | 26 (81.3)     | 23 (79.3)       | 3 (11.1)     | 14 (66.7)   | 3 (27.3)              |           |           |           |           |           |
| Female                                 | 6 (18.8)      | 6 (20.7)        | 24 (88.9)    | 7 (33.3)    | 8 (72.7)              |           |           |           |           |           |
| Age                                    |               |                 |              |             |                       |           |           |           |           |           |
| 20~29                                  | 7 (21.9)      | 6 (20.7)        | 6 (22.2)     | 3 (14.3)    | 2 (18.2)              |           |           |           |           |           |
| 30~39                                  | 7 (21.9)      | 2 (6.9)         | 4 (14.8)     | 3 (14.3)    | 5 (45.5)              |           |           |           |           |           |
| 40~49                                  | 11 (34.4)     | 9 (31)          | 4 (14.8)     | 7 (33.3)    | 3 (27.3)              |           |           |           |           |           |
| 50~59                                  | 5 (15.6)      | 9 (31)          | 8 (29.6)     | 8 (38.1)    | 1 (9.1)               |           |           |           |           |           |
| 60~                                    | 2 (6.3)       | 3 (10.3)        | 5 (18.5)     | 0 (0)       | 0 (0)                 |           |           |           |           |           |
| Education                              |               |                 |              |             |                       |           |           |           |           |           |
| ≤ High school                          | 5 (15.6)      | 8 (27.6)        | 9 (33.3)     | 2 (9.5)     | 0 (0)                 |           |           |           |           |           |
| College or University                  | 25 (78.1)     | 18 (62.1)       | 14 (51.9)    | 17 (81)     | 7 (63.6)              |           |           |           |           |           |
| Graduate school                        | 2 (6.3)       | 3 (10.3)        | 4 (14.8)     | 2 (9.5)     | 4 (36.4)              |           |           |           |           |           |
| Annual Household income (KRW, million) |               |                 |              |             |                       |           |           |           |           |           |
| 1st Tercile (–30)                      | 10 (31.3)     | 6 (20.7)        | 10 (37)      | 6 (28.6)    | 4 (36.4)              |           |           |           |           |           |
| 2nd Tercile (30–50)                    | 7 (21.9)      | 8 (27.6)        | 9 (33.3)     | 4 (19)      | 3 (27.3)              |           |           |           |           |           |

|                             |           |           |           |           |           |
|-----------------------------|-----------|-----------|-----------|-----------|-----------|
| 3rd Tercile (51–75)         | 15 (46.9) | 15 (51.7) | 8 (29.6)  | 11 (52.4) | 4 (36.4)  |
| <b>Marital status</b>       |           |           |           |           |           |
| Single                      | 12 (37.5) | 8 (27.6)  | 9 (33.3)  | 4 (19)    | 2 (18.2)  |
| Married                     | 19 (59.4) | 19 (65.5) | 14 (51.9) | 16 (76.2) | 8 (72.7)  |
| Separated                   | 0 (0)     | 0 (0)     | 0 (0)     | 1 (4.8)   | 1 (9.1)   |
| Widowed                     | 0 (0)     | 0 (0)     | 2 (7.4)   | 0 (0)     | 0 (0)     |
| Divorced                    | 1 (3.1)   | 2 (6.9)   | 2 (7.4)   | 0 (0)     | 0 (0)     |
| <b>Employment status</b>    |           |           |           |           |           |
| Regular                     | 28 (87.5) | 27 (93.1) | 24 (88.9) | 21 (100)  | 8 (72.7)  |
| Temporary                   | 4 (12.5)  | 1 (3.4)   | 2 (7.4)   | 0 (0)     | 3 (27.3)  |
| Day labourer                | 0 (0)     | 1 (3.4)   | 1 (3.7)   | 0 (0)     | 0 (0)     |
| <b>Occupation</b>           |           |           |           |           |           |
| White collar                | 24 (75)   | 16 (55.2) | 13 (48.1) | 15 (71.4) | 9 (81.8)  |
| Blue collar                 | 8 (25)    | 13 (44.8) | 14 (51.9) | 6 (28.6)  | 2 (18.2)  |
| <b>Weekly working hours</b> |           |           |           |           |           |
| < 40 hours / week           | 3 (9.4)   | 2 (6.9)   | 8 (29.6)  | 4 (19)    | 2 (18.2)  |
| = 40 hours / week           | 10 (31.3) | 11 (37.9) | 8 (29.6)  | 9 (42.9)  | 4 (36.4)  |
| 41–52 hours / week          | 12 (37.5) | 8 (27.6)  | 6 (22.2)  | 5 (23.8)  | 3 (27.3)  |
| > 52 hours / week           | 7 (21.9)  | 8 (27.6)  | 5 (18.5)  | 3 (14.3)  | 2 (18.2)  |
| <b>Smoking</b>              |           |           |           |           |           |
| No                          | 14 (43.8) | 21 (72.4) | 22 (81.5) | 18 (85.7) | 9 (81.8)  |
| Yes                         | 18 (56.3) | 8 (27.6)  | 5 (18.5)  | 3 (14.3)  | 2 (18.2)  |
| <b>Binge drinking</b>       |           |           |           |           |           |
| No                          | 14 (43.8) | 19 (65.5) | 17 (63)   | 15 (71.4) | 9 (81.8)  |
| Yes                         | 18 (56.3) | 10 (34.5) | 10 (37)   | 6 (28.6)  | 2 (18.2)  |
| <b>Exercise</b>             |           |           |           |           |           |
| No                          | 25 (78.1) | 19 (65.5) | 24 (88.9) | 14 (66.7) | 10 (90.9) |
| Yes                         | 7 (21.9)  | 10 (34.5) | 3 (11.1)  | 7 (33.3)  | 1 (9.1)   |

**Table S2.** HRPL by the health conditions, comparing to the participants without any health conditions.

| Health Condition                             | Total       |      |                                       |        | Male       |                                            |         |        | Female                                     |         |      |        |
|----------------------------------------------|-------------|------|---------------------------------------|--------|------------|--------------------------------------------|---------|--------|--------------------------------------------|---------|------|--------|
|                                              | n (%)       | Rank | The ratio of HRPL                     |        | n (%)      | Rank (vs. without any health conditions) * | p-value | n (%)  | Rank (vs. without any health conditions) * | p-value |      |        |
|                                              |             |      | (vs. without any health conditions) * |        |            |                                            |         |        |                                            |         |      |        |
| Fatigue                                      | 1507 (38.8) | 1    | 1.79                                  | <.0001 | 633 (32.6) | 1                                          | 1.72    | <.0001 | 874 (45.1)                                 | 1       | 1.96 | <.0001 |
| Neck and/or shoulder pain                    | 1208 (31.1) | 2    | 1.92                                  | <.0001 | 447 (23)   | 3                                          | 1.86    | <.0001 | 761 (39.3)                                 | 2       | 2.03 | <.0001 |
| Sleep deprivation                            | 1077 (27.7) | 3    | 1.96                                  | <.0001 | 477 (24.5) | 2                                          | 1.83    | <.0001 | 600 (31)                                   | 3       | 2.18 | <.0001 |
| Back pain                                    | 938 (24.2)  | 4    | 2.00                                  | <.0001 | 382 (19.7) | 4                                          | 1.87    | <.0001 | 556 (28.7)                                 | 4       | 2.20 | <.0001 |
| Headache                                     | 838 (21.6)  | 5    | 2.06                                  | <.0001 | 283 (14.6) | 6                                          | 1.98    | <.0001 | 555 (28.6)                                 | 5       | 2.18 | <.0001 |
| Common cold and flu                          | 757 (19.5)  | 6    | 1.98                                  | <.0001 | 311 (16)   | 5                                          | 1.95    | <.0001 | 446 (23)                                   | 6       | 2.08 | <.0001 |
| Eye disorders                                | 516 (13.3)  | 7    | 1.95                                  | <.0001 | 155 (8)    | 11                                         | 2.00    | 0.0002 | 361 (18.6)                                 | 7       | 1.94 | <.0001 |
| Diarrhea or constipation                     | 442 (11.4)  | 8    | 2.14                                  | <.0001 | 167 (8.6)  | 9                                          | 2.01    | 0.0001 | 275 (14.2)                                 | 8       | 2.24 | <.0001 |
| Insomnia                                     | 378 (9.7)   | 9    | 2.39                                  | <.0001 | 170 (8.7)  | 8                                          | 2.33    | <.0001 | 208 (10.7)                                 | 9       | 2.53 | <.0001 |
| Anxiety                                      | 358 (9.2)   | 10   | 2.46                                  | <.0001 | 161 (8.3)  | 10                                         | 2.40    | <.0001 | 197 (10.2)                                 | 10      | 2.62 | <.0001 |
| Having a hangover                            | 303 (7.8)   | 12   | 2.42                                  | <.0001 | 211 (10.9) | 7                                          | 2.02    | <.0001 | 114 (5.9)                                  | 15      | 1.88 | 0.0075 |
| Depression                                   | 296 (7.6)   | 13   | 2.38                                  | <.0001 | 110 (5.7)  | 14                                         | 2.40    | <.0001 | 193 (10)                                   | 11      | 2.48 | <.0001 |
| Enterocolitis                                | 325 (8.4)   | 11   | 1.93                                  | <.0001 | 131 (6.7)  | 12                                         | 2.43    | <.0001 | 165 (8.5)                                  | 12      | 2.44 | <.0001 |
| Skin disease or itching                      | 279 (7.2)   | 14   | 1.94                                  | <.0001 | 114 (5.9)  | 13                                         | 1.78    | 0.0093 | 165 (8.5)                                  | 12      | 2.13 | <.0001 |
| Dental problems                              | 213 (5.5)   | 15   | 2.01                                  | <.0001 | 99 (5.1)   | 15                                         | 1.91    | 0.0063 | 114 (5.9)                                  | 15      | 2.24 | 0.0004 |
| Allergic disease                             | 203 (5.2)   | 16   | 2.04                                  | <.0001 | 58 (3)     | 21                                         | 1.99    | 0.0296 | 145 (7.5)                                  | 14      | 2.13 | 0.0002 |
| Respiratory symptoms                         | 175 (4.5)   | 17   | 2.25                                  | <.0001 | 85 (4.4)   | 17                                         | 2.13    | 0.0036 | 90 (4.6)                                   | 19      | 2.52 | 0.0003 |
| Urinary symptoms                             | 175 (4.5)   | 17   | 2.14                                  | <.0001 | 72 (3.7)   | 18                                         | 2.20    | 0.0046 | 103 (5.3)                                  | 18      | 1.93 | 0.0073 |
| Anemia                                       | 147 (3.8)   | 19   | 2.47                                  | <.0001 | 33 (1.7)   | 26                                         | 2.50    | 0.0260 | 114 (5.9)                                  | 15      | 2.46 | <.0001 |
| Esophagitis                                  | 144 (3.7)   | 20   | 2.36                                  | <.0001 | 62 (3.2)   | 20                                         | 2.19    | 0.0102 | 82 (4.2)                                   | 20      | 2.65 | 0.0002 |
| Hypertension                                 | 117 (3)     | 22   | 2.56                                  | 0.0002 | 96 (4.9)   | 16                                         | 2.24    | 0.0011 | 23 (1.2)                                   | 28      | 2.72 | 0.0617 |
| Gastric ulcer or duodenal ulcer              | 119 (3.1)   | 21   | 2.28                                  | <.0001 | 50 (2.6)   | 23                                         | 2.66    | 0.0039 | 67 (3.5)                                   | 22      | 2.54 | 0.0017 |
| Upper limb or lower limb pain                | 106 (2.7)   | 23   | 2.34                                  | 0.0003 | 35 (1.8)   | 24                                         | 2.57    | 0.0192 | 71 (3.7)                                   | 21      | 2.31 | 0.0039 |
| Dyslipidemia                                 | 91 (2.3)    | 24   | 2.58                                  | 0.0002 | 65 (3.3)   | 19                                         | 2.72    | 0.0007 | 26 (1.3)                                   | 26      | 2.58 | 0.0578 |
| Post-menopausal or post-andropausal symptoms | 83 (2.1)    | 25   | 2.47                                  | 0.0020 | 16 (0.8)   | 30                                         | 2.74    | 0.0906 | 64 (3.3)                                   | 23      | 2.58 | 0.0076 |
| Hearing impairment                           | 80 (2.1)    | 26   | 2.41                                  | 0.0007 | 53 (2.7)   | 22                                         | 2.10    | 0.0216 | 30 (1.6)                                   | 25      | 2.74 | 0.0217 |
| Asthma                                       | 47 (1.2)    | 28   | 2.32                                  | 0.0378 | 32 (1.7)   | 27                                         | 1.76    | 0.1833 | 19 (1)                                     | 29      | 2.47 | 0.1038 |

| Health Condition      | Total    |      |                                     |                   | Male     |      |                                            |                     | Female   |      |                                            |                     |
|-----------------------|----------|------|-------------------------------------|-------------------|----------|------|--------------------------------------------|---------------------|----------|------|--------------------------------------------|---------------------|
|                       | n (%)    | Rank | The ratio of HRPL                   |                   | n (%)    | Rank | The ratio of HRPL                          |                     | n (%)    | Rank | The ratio of HRPL                          |                     |
|                       |          |      | (vs. without any health conditions) | * <i>p</i> -value |          |      | (vs. without any health condi-<br>tions) * | <i>p</i> -<br>value |          |      | (vs. without any health condi-<br>tions) * | <i>p</i> -<br>value |
| Diabetes mellitus     | 51 (1.3) | 27   | 2.00                                | 0.0166            | 35 (1.8) | 24   | 2.15                                       | 0.0607              | 12 (0.6) | 30   | 2.90                                       | 0.1313              |
| Etc.                  | 47 (1.2) | 28   | 1.60                                | 0.1901            | 15 (0.8) | 31   | 1.25                                       | 0.7218              | 32 (1.7) | 24   | 1.87                                       | 0.1557              |
| Liver disease         | 29 (0.7) | 31   | 2.55                                | 0.1050            | 26 (1.3) | 28   | 2.02                                       | 0.1313              | 6 (0.3)  | 33   | 2.07                                       | 0.4786              |
| Cardiac disease       | 27 (0.7) | 32   | 2.67                                | 0.0336            | 23 (1.2) | 29   | 2.72                                       | 0.0410              | 6 (0.3)  | 33   | 2.75                                       | 0.3069              |
| Osteoporosis          | 32 (0.8) | 30   | 1.99                                | 0.0435            | 3 (0.2)  | 33   | 2.05                                       | 0.6057              | 24 (1.2) | 27   | 2.74                                       | 0.0516              |
| Cancer                | 21 (0.5) | 33   | 2.71                                | 0.0562            | 14 (0.7) | 32   | 2.28                                       | 0.1924              | 7 (0.4)  | 32   | 4.40                                       | 0.1122              |
| Infertility treatment | 11 (0.3) | 34   | 2.86                                | 0.1471            | 3 (0.2)  | 33   | 2.32                                       | 0.5407              | 8 (0.4)  | 31   | 2.82                                       | 0.2292              |

\* The ratio of HRPL of participants with a specific health condition to HRPL of participants without any health conditions, calculated by negative binomial regression models, adjusted for age, gender, education level, household income, marital status, employment status, and weekly working hours. HRPL: health-related productivity loss,  $p < 0.0014$  was in bold.

**Table S3.** Absenteeism and presenteeism according to symptom, comparing to the participants without any health conditions.

| Health Conditions                            | n (%)       | Rank | Absenteeism                                                     |                 |      | Presenteeism                                                     |               |      |
|----------------------------------------------|-------------|------|-----------------------------------------------------------------|-----------------|------|------------------------------------------------------------------|---------------|------|
|                                              |             |      | The ratio of absenteeism<br>(vs. without any health conditions) | *p-value        | Rank | The ratio of presenteeism<br>(vs. without any health conditions) | *p-value      | Rank |
| Fatigue                                      | 1507 (38.8) | 1    | 2.19                                                            | 0.0018          | 33   | 1.80                                                             | <.0001        | 33   |
| Neck and/or shoulder pain                    | 1208 (31.1) | 2    | 2.26                                                            | 0.0022          | 31   | 1.93                                                             | <.0001        | 31   |
| Sleep deprivation                            | 1077 (27.7) | 3    | 2.28                                                            | 0.0030          | 30   | 1.97                                                             | <.0001        | 30   |
| Back pain                                    | 938 (24.2)  | 4    | 2.49                                                            | 0.0018          | 28   | 2.01                                                             | <.0001        | 28   |
| Headache                                     | 838 (21.6)  | 5    | <b>2.77</b>                                                     | <b>0.0002</b>   | 21   | 2.06                                                             | <.0001        | 21   |
| Common cold and flu                          | 757 (19.5)  | 6    | <b>3.16</b>                                                     | < <b>0.0001</b> | 18   | 1.98                                                             | <.0001        | 18   |
| Eye disorders                                | 516 (13.3)  | 7    | 2.64                                                            | 0.0045          | 25   | 1.95                                                             | <.0001        | 25   |
| Diarrhea or constipation                     | 442 (11.4)  | 8    | 2.24                                                            | 0.0232          | 32   | 2.13                                                             | <.0001        | 32   |
| Insomnia                                     | 378 (9.7)   | 9    | <b>3.69</b>                                                     | <b>0.0005</b>   | 14   | 2.39                                                             | <.0001        | 14   |
| Anxiety                                      | 358 (9.2)   | 10   | <b>4.03</b>                                                     | <b>0.0004</b>   | 13   | 2.47                                                             | <.0001        | 13   |
| Having a hangover                            | 303 (7.8)   | 12   | 2.66                                                            | 0.0353          | 24   | 1.90                                                             | <.0001        | 24   |
| Depression                                   | 296 (7.6)   | 13   | 2.85                                                            | 0.0184          | 20   | 2.43                                                             | <.0001        | 20   |
| Enterocolitis                                | 325 (8.4)   | 11   | 3.10                                                            | 0.0063          | 19   | 2.41                                                             | <.0001        | 19   |
| Skin disease or itching                      | 279 (7.2)   | 14   | 2.52                                                            | 0.0506          | 26   | 1.96                                                             | <.0001        | 26   |
| Dental problems                              | 213 (5.5)   | 15   | 2.72                                                            | 0.0611          | 22   | 2.01                                                             | <.0001        | 22   |
| Allergic disease                             | 203 (5.2)   | 16   | 2.71                                                            | 0.0773          | 23   | 2.05                                                             | <.0001        | 23   |
| Respiratory symptoms                         | 175 (4.5)   | 17   | 5.09                                                            | 0.0040          | 7    | 2.22                                                             | <.0001        | 7    |
| Urinary symptoms                             | 175 (4.5)   | 17   | 2.52                                                            | 0.1537          | 27   | 2.16                                                             | <.0001        | 27   |
| Anemia                                       | 147 (3.8)   | 19   | 4.69                                                            | 0.0202          | 8    | 2.44                                                             | <.0001        | 8    |
| Esophagitis                                  | 144 (3.7)   | 20   | 3.18                                                            | 0.0952          | 17   | 2.39                                                             | <.0001        | 17   |
| Hypertension                                 | 117 (3)     | 22   | 5.13                                                            | 0.0136          | 6    | 2.24                                                             | <b>0.0004</b> | 6    |
| Gastric ulcer or duodenal ulcer              | 119 (3.1)   | 21   | 4.51                                                            | 0.0310          | 10   | 2.58                                                             | <.0001        | 10   |
| Upper limb or lower limb pain                | 106 (2.7)   | 23   | 3.35                                                            | 0.1157          | 16   | 2.36                                                             | <b>0.0003</b> | 16   |
| Dyslipidemia                                 | 91 (2.3)    | 24   | 5.79                                                            | 0.0144          | 5    | 2.53                                                             | <b>0.0004</b> | 5    |
| Post-menopausal or post-andropausal symptoms | 83 (2.1)    | 25   | 3.62                                                            | 0.1590          | 15   | 2.45                                                             | 0.0026        | 15   |
| Hearing impairment                           | 80 (2.1)    | 26   | 4.24                                                            | 0.0966          | 12   | 2.40                                                             | <b>0.0009</b> | 12   |
| Asthma                                       | 47 (1.2)    | 28   | 4.30                                                            | 0.1999          | 11   | 1.96                                                             | 0.0486        | 11   |
| Diabetes mellitus                            | 51 (1.3)    | 27   | 6.56                                                            | 0.0965          | 4    | 2.08                                                             | 0.0419        | 4    |
| Etc.                                         | 47 (1.2)    | 28   | 0.04                                                            | 0.0457          | 34   | 1.65                                                             | 0.1696        | 34   |
| Liver disease                                | 29 (0.7)    | 31   | 13.46                                                           | 0.0645          | 3    | 1.72                                                             | 0.2120        | 3    |
| Cardiac disease                              | 27 (0.7)    | 32   | 2.37                                                            | 0.5511          | 29   | 2.57                                                             | 0.0359        | 29   |
| Osteoporosis                                 | 32 (0.8)    | 30   | 4.55                                                            | 0.3567          | 9    | 2.64                                                             | 0.0505        | 9    |
| Cancer                                       | 21 (0.5)    | 33   | 28.84                                                           | 0.0903          | 1    | 2.70                                                             | 0.0625        | 1    |
| Infertility treatment                        | 11 (0.3)    | 34   | 14.97                                                           | 0.4629          | 2    | 2.93                                                             | 0.1456        | 2    |

\* The ratio of absenteeism and presenteeism of participants with a specific health condition to HRPL of participants without any health conditions, calculated by negative binomial regression models, adjusted for age, gender, education level, household income, marital status, employment status, and weekly working hours. HRPL: health-related productivity loss,  $p < 0.0014$  was in bold.



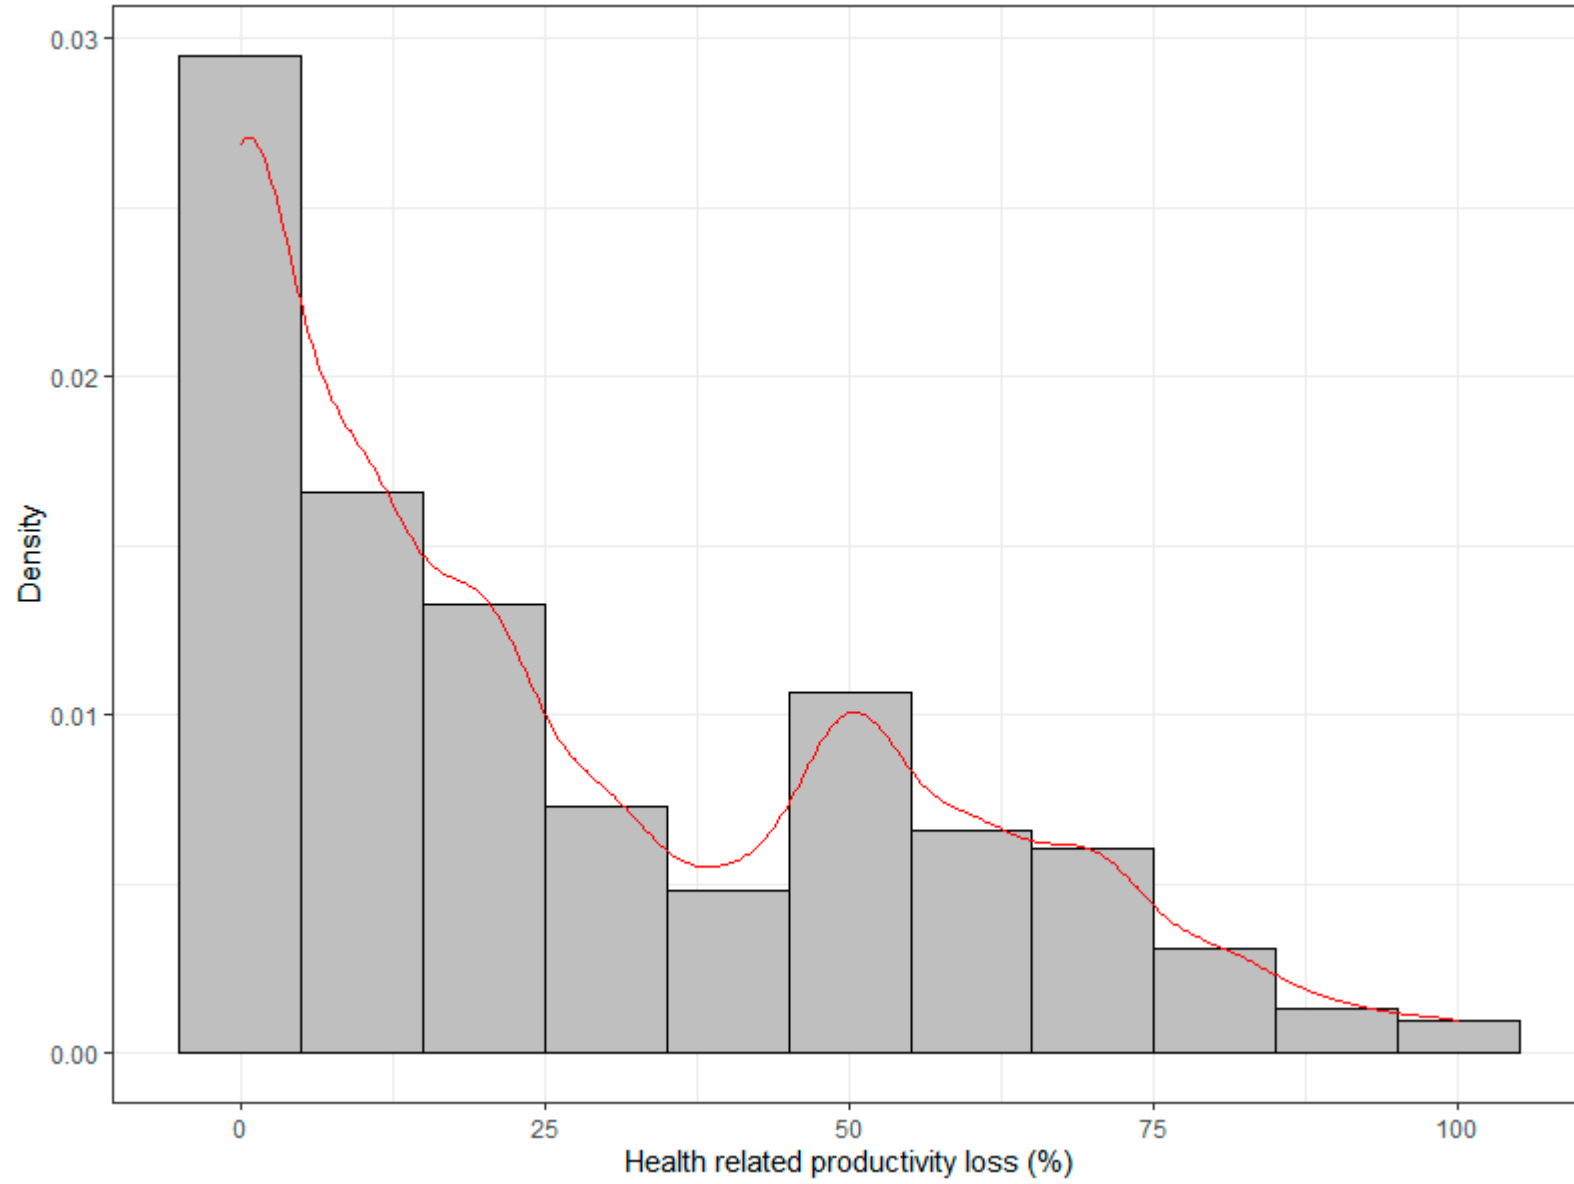

**Figure S1.** Histogram of health-related productivity loss among the participants.

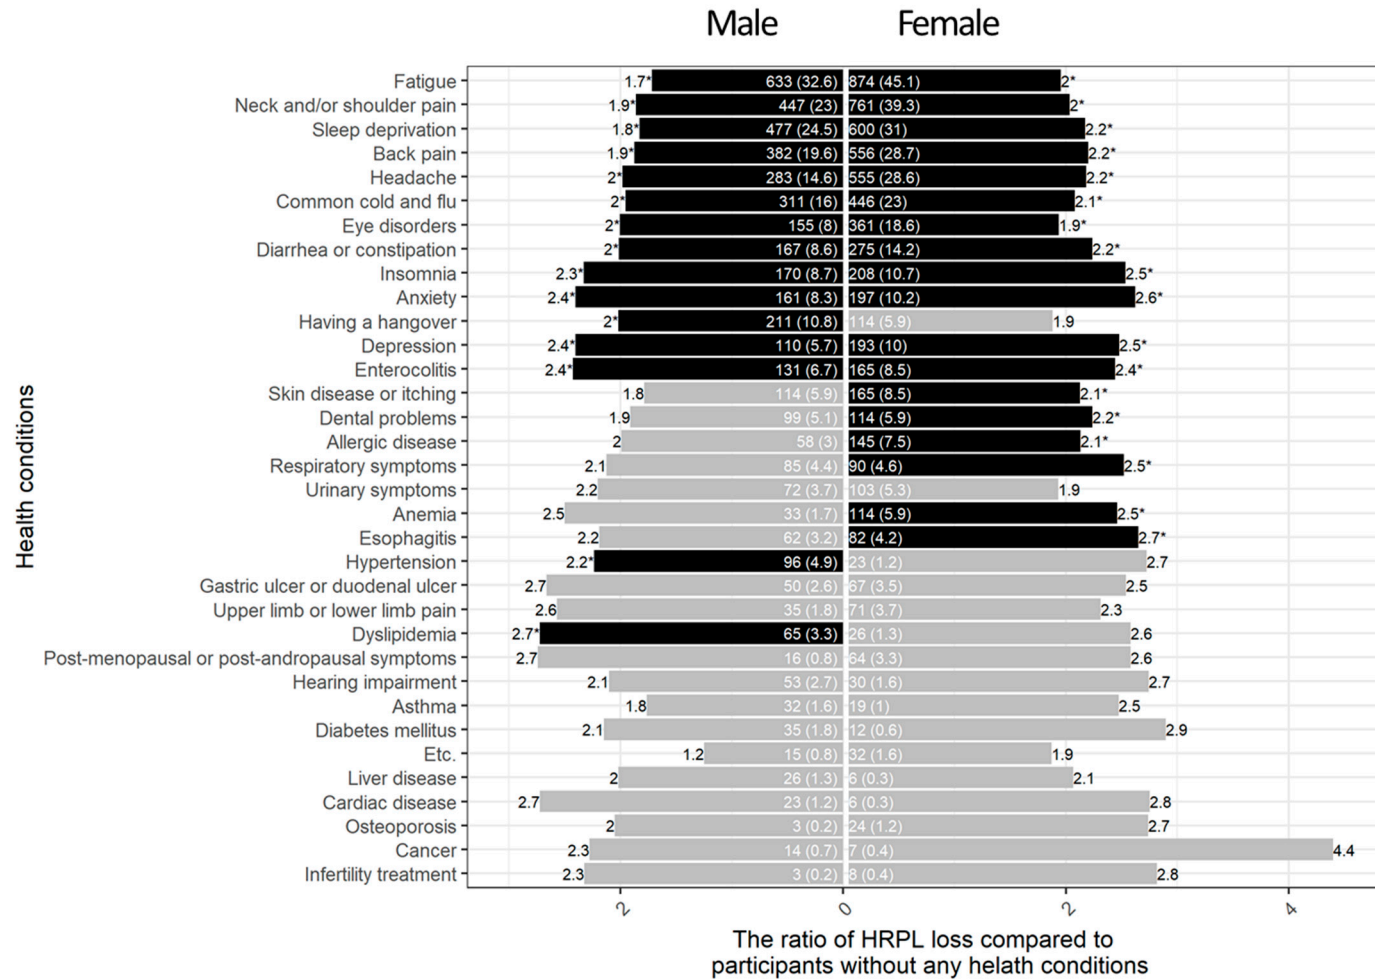

**Figure S2.** Percent HRPL according to health conditions, comparing to the participants without any health conditions by gender.

Percent health-related productivity loss among workers with specific health conditions, comparing to the participants without any health conditions. The number of workers and percent who complaint specific health conditions were presented in the bottom of the bar plot. The ratio of HRPL loss of participants with specific health conditions to participants without any health conditions was calculated with the adjustment for age, gender, education level, household income, marital status, employment status, and weekly working hours. \*  $p < 0.0014$  was in black.

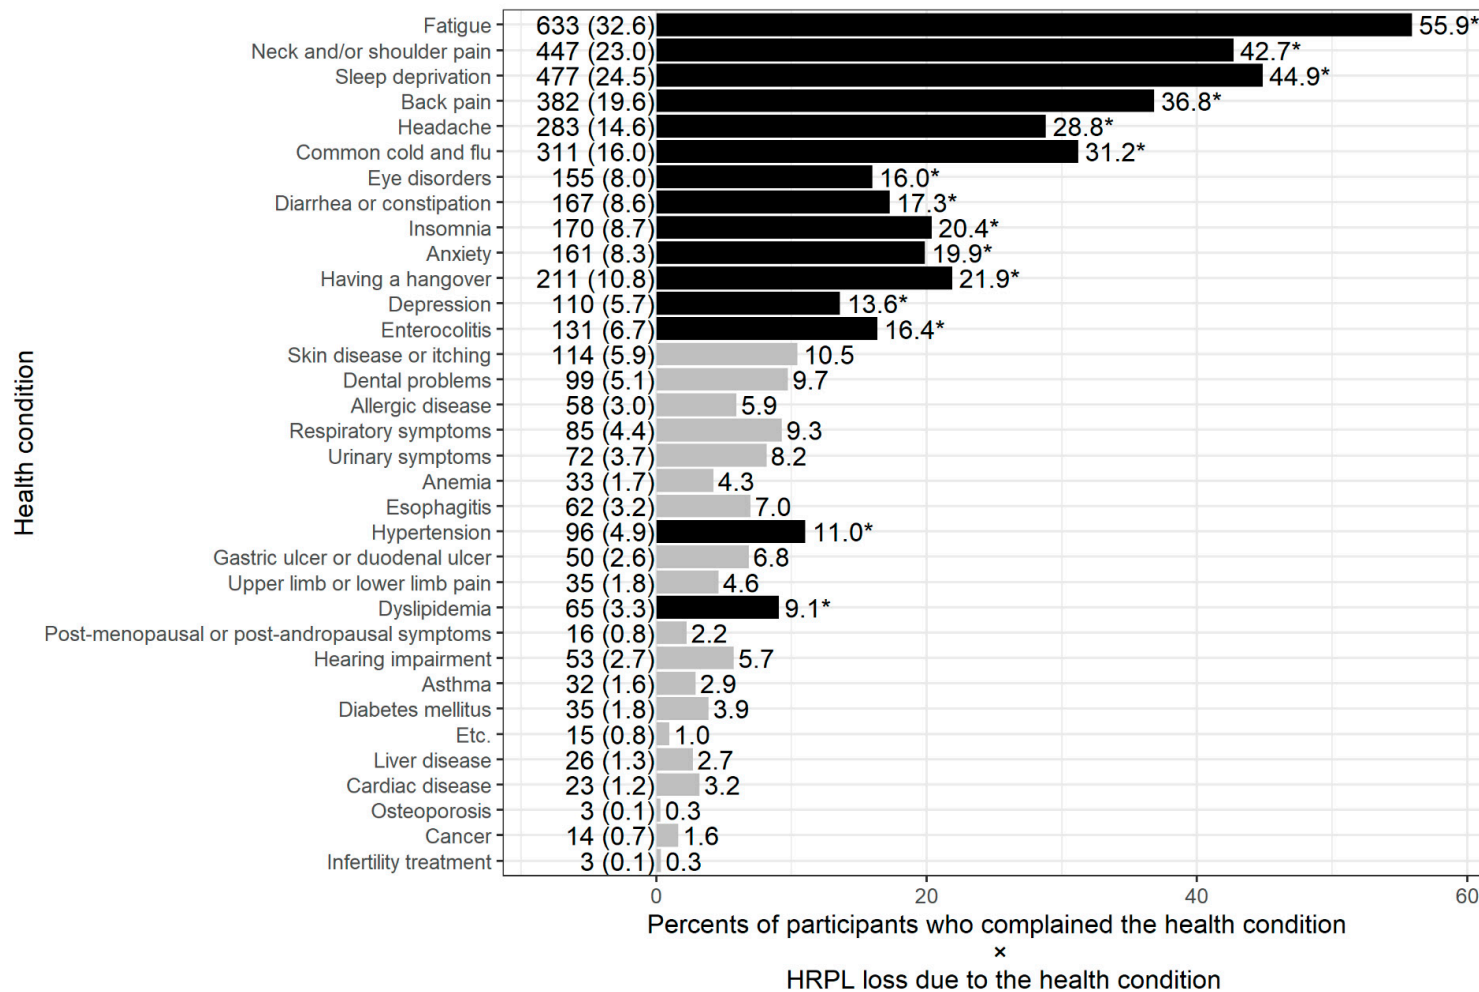

**Figure S3.** Work impairment burden of health conditions comparing to the participants without any health conditions (male).

Percent health-related productivity loss among workers with specific health conditions, comparing to the participants without any health conditions. The number of workers and percent who complaint specific health conditions were presented in the bottom of the bar plot The ratio of HRPL loss of participants with specific health conditions to participants without any health conditions was calculated with the adjustment for age, gender, education level, household income, marital status, employment status, and weekly working hours. \*  $p < 0.0014$  was in black.

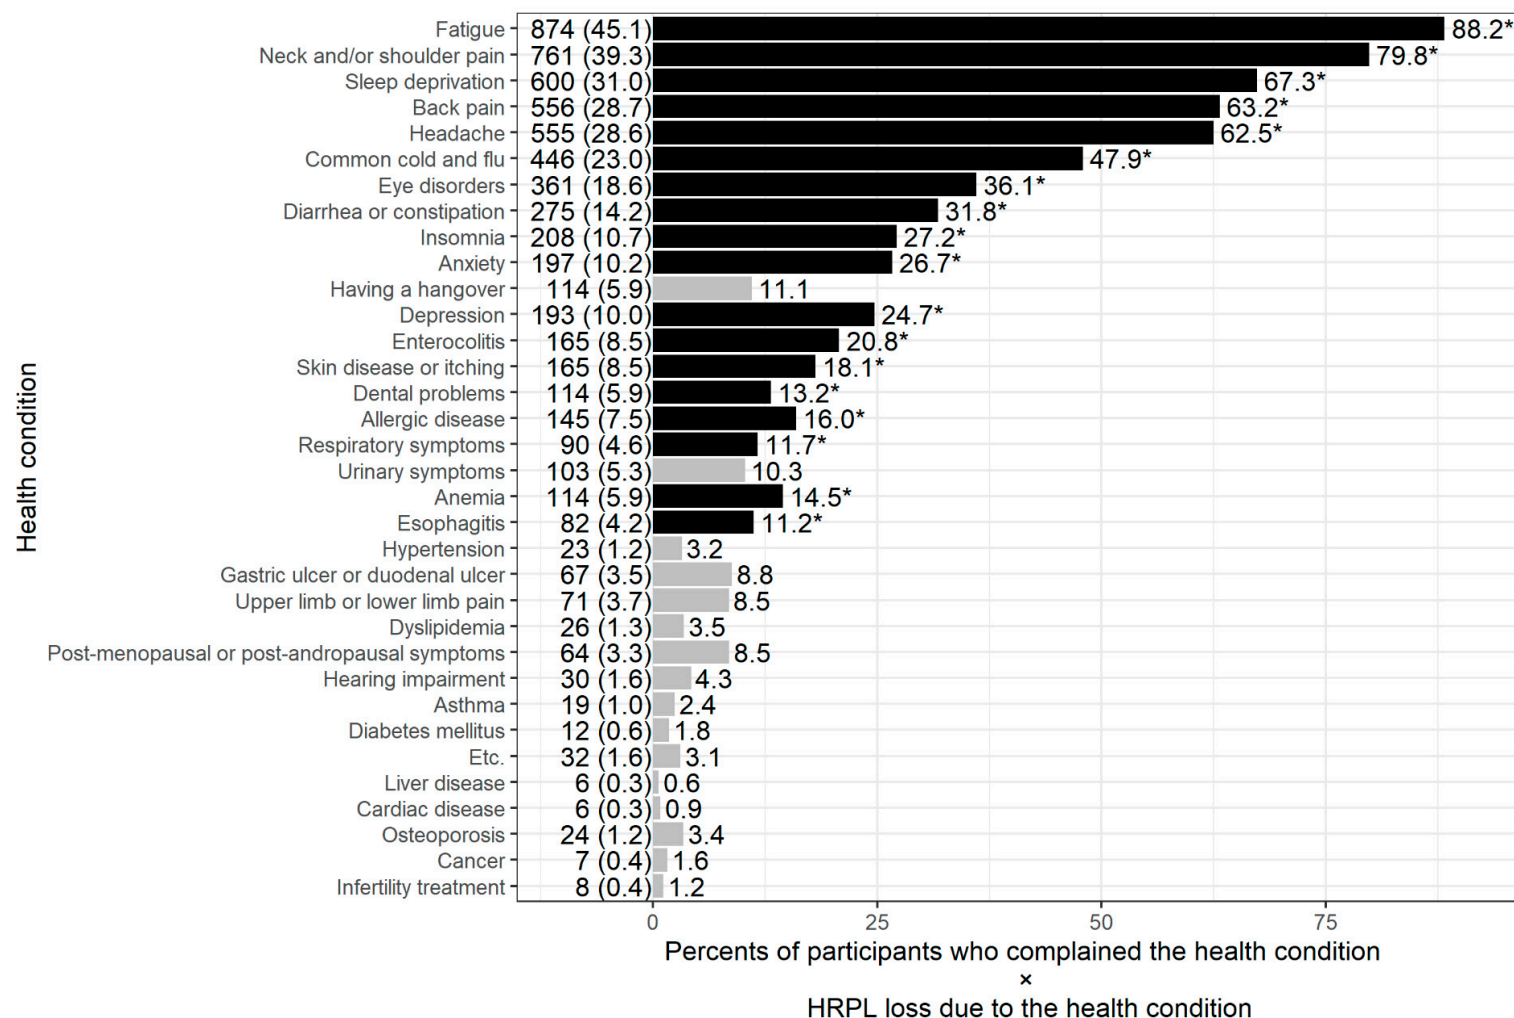

**Figure S4.** Work impairment burden of health conditions comparing to the participants without any health conditions (female).

Percent health-related productivity loss among workers with specific health conditions, comparing to the participants without any health conditions. The number of workers and percent who complaint specific health conditions were presented in the bottom of the bar plot. The ratio of HRPL loss of participants with specific health conditions to participants without any health conditions was calculated with the adjustment for age, gender, education level, household income, marital status, employment status, and weekly working hours. \*  $p < 0.0014$  was in black.
